# Supplementary material
Source: MDPI journal article supplement (https://www.mdpi.com/2571-6131/2/1/1)
Supplement: s1 [file s1]

# Supplementary

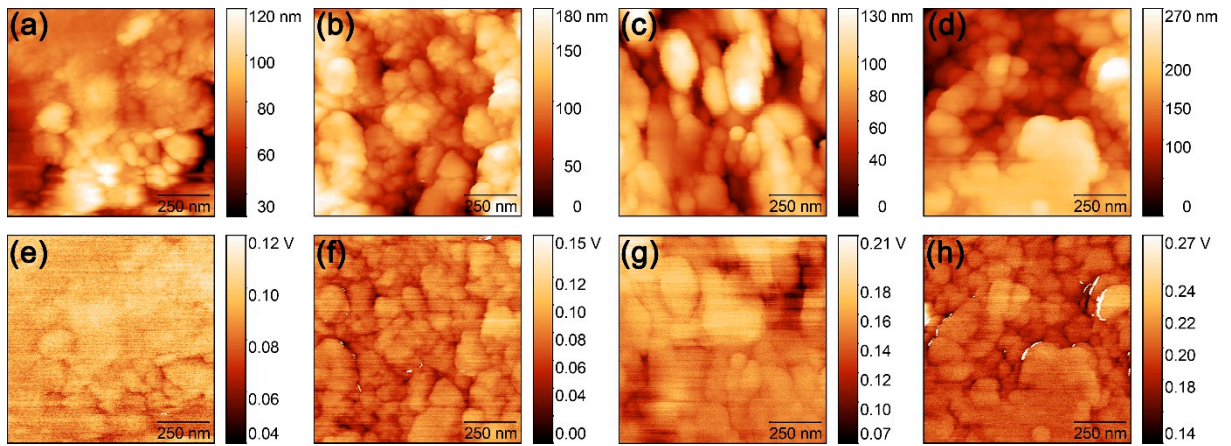

Figure s1. (a)-(d) Topography and (e)-(h) surface potential of  $\text{La}_{1-x}\text{Nd}_x\text{FeO}_3$  in dependence of Nd doping degree. (a), (e) 0.5%; (b), (f) 1%; (c), (g) 5%; (d), (h) 10%.
